# Supplementary material for: Neutralizing Potency of Prototype and Omicron RBD mRNA Vaccines Against Omicron Variant
Source: PubMed Central journal article supplement (PMC9280631; doi:10.3389/fimmu.2022.908478), 2022-06-30
Supplement: DataSheet_1.pdf [file DataSheet_1.pdf]

## Supplementary Information

Jinkai Zang<sup>#</sup>, Yannan Yin <sup>#</sup>, Shiqi Xu, Weihua Qiao, Qiuyue Liu, Dimitri Lavillette,  
Chao Zhang<sup>\*</sup>, Haikun Wang<sup>\*</sup>, Zhong Huang <sup>\*</sup>

<sup>1</sup> CAS Key Laboratory of Molecular Virology & Immunology, Institut Pasteur of Shanghai,  
Chinese Academy of Sciences, University of Chinese Academy of Sciences, Shanghai, China

<sup>#</sup> These authors contributed equally.

<sup>\*</sup> Corresponding author: Zhong Huang ([huangzhong@ips.ac.cn](mailto:huangzhong@ips.ac.cn)), Haikun Wang ([hkwang@ips.ac.cn](mailto:hkwang@ips.ac.cn)) or Chao Zhang ([chaozhang@ips.ac.cn](mailto:chaozhang@ips.ac.cn))

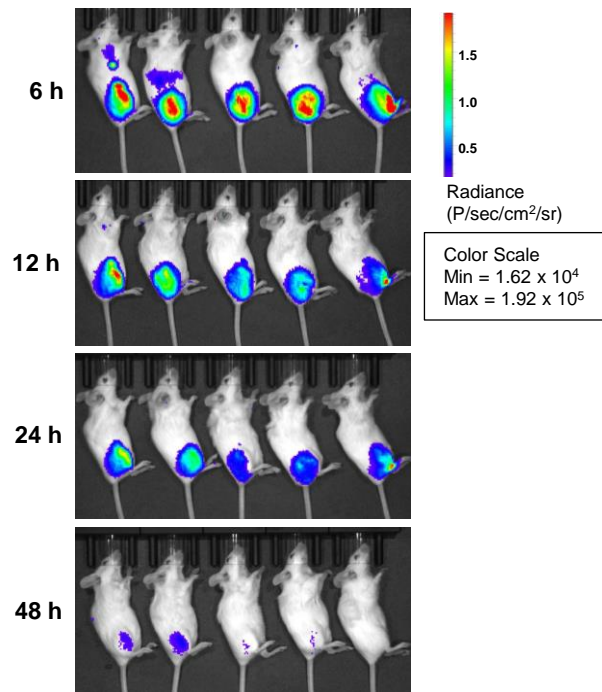

**Supplementary Fig. S1** Characterization of the mRNA-LNP expression in vivo. Mice were injected with the FLuc-mRNA-LNP formulation and then subjected to bioluminescence imaging at different time points.
